# Supplementary material for: A Drosophila RNAi library modulates Hippo pathway-dependent tissue growth
Source: PubMed Central journal article supplement (PMC4735554; doi:10.1038/ncomms10368), 2016-01-13
Supplement: ncomms10368-s1.pdf [file ncomms10368-s1.pdf]

## SUPPLEMENTARY FIGURES

### Supplementary Figure 1

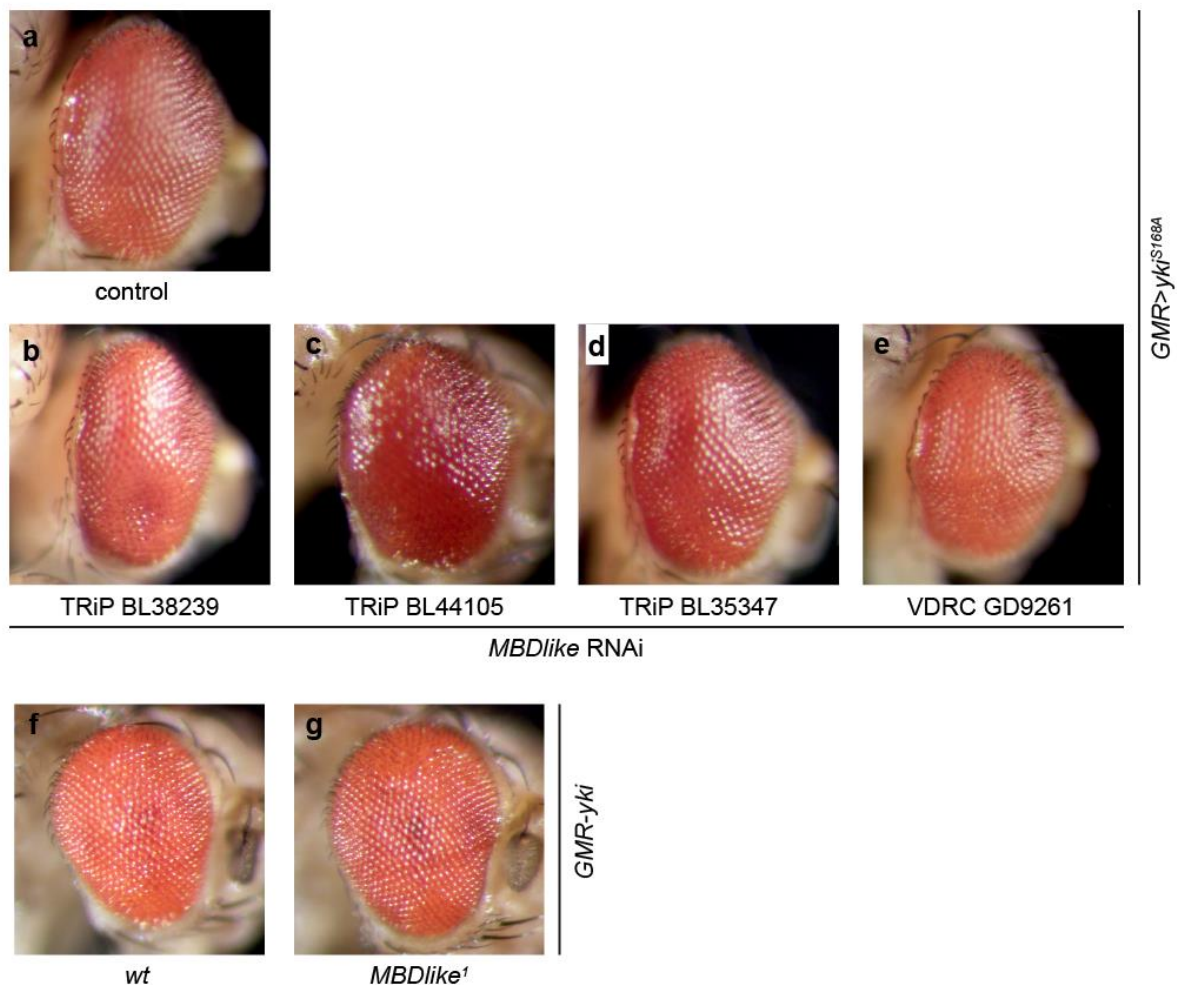

**Supplementary Figure 1. Neither knockdown using alternative RNAi lines, nor mutation of *MBDlike* enhances the Yki eye-specific overexpression phenotype.**

(a-e) Adult eye phenotypes of F<sub>1</sub> flies carrying *GMR-Gal4*, *UAS-Yki<sup>S168A</sup>* transgenes crossed to a control RNAi line ( $\beta$  galactosidase RNAi VDRC GD51446) (a), and *MBDlike* RNAi lines Bloomington TRiP 38239 (b), 44105 (c), 35347 (d) and VDRC GD9261 (e).

(f,g) Adult eye phenotypes of *MBDlike* wild type (f) or mutant (g) flies carrying a *GMR-yki* transgene.

Supplementary Figure 2

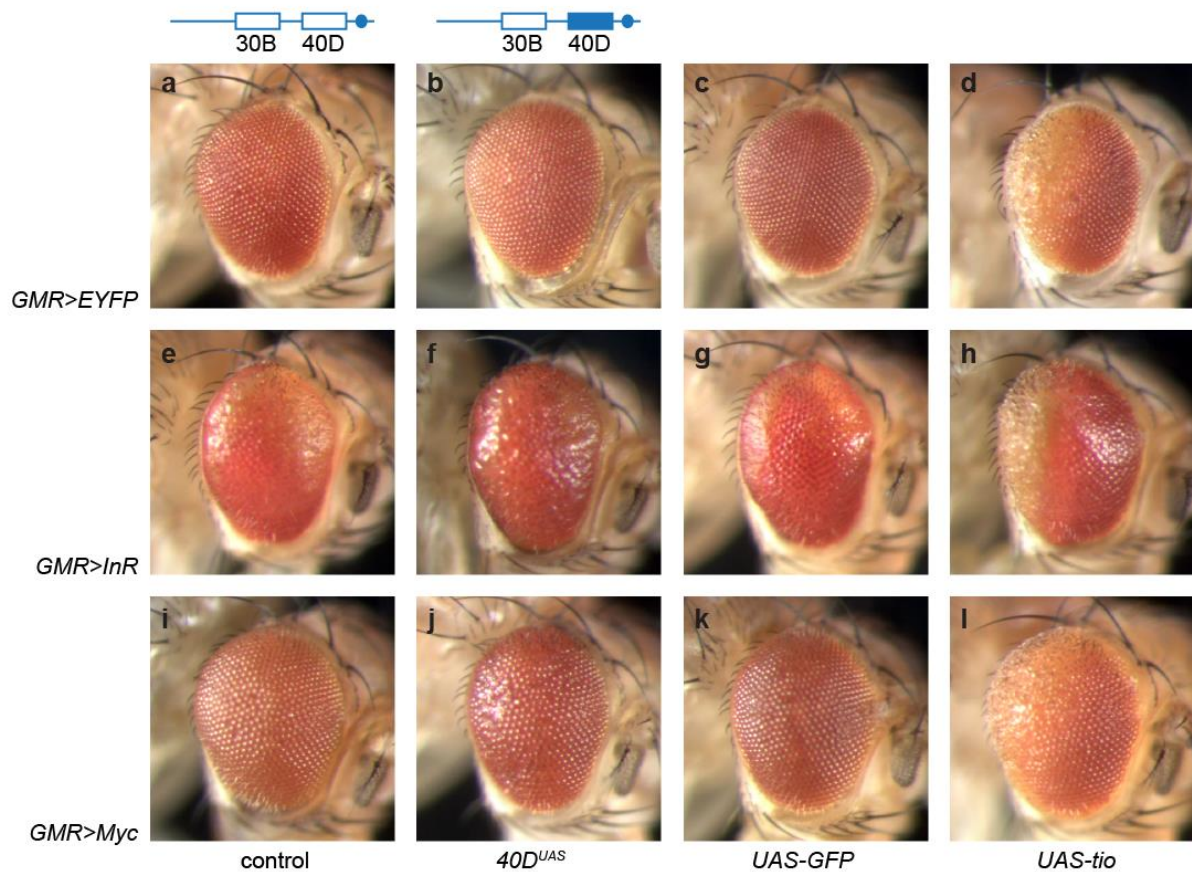

**Supplementary Figure 2. Neither transgene insertion at 40D, nor *tiptop* overexpression enhances *dMyc* and *InR* eye-specific overexpression phenotypes.**

Adult eye phenotypes of F<sub>1</sub> flies carrying *GMR-Gal4* and either *UAS-EYFP* (a-d), *UAS-InR* (e-h), or *UAS-dMyc* (i-l) transgenes crossed to; VDRC genetic background (a, e, i),  $40D^{UAS}$  (b, f, j), *UAS-GFP* (c, g, k), *UAS-tio* (d, h, l).

Supplementary Figure 3

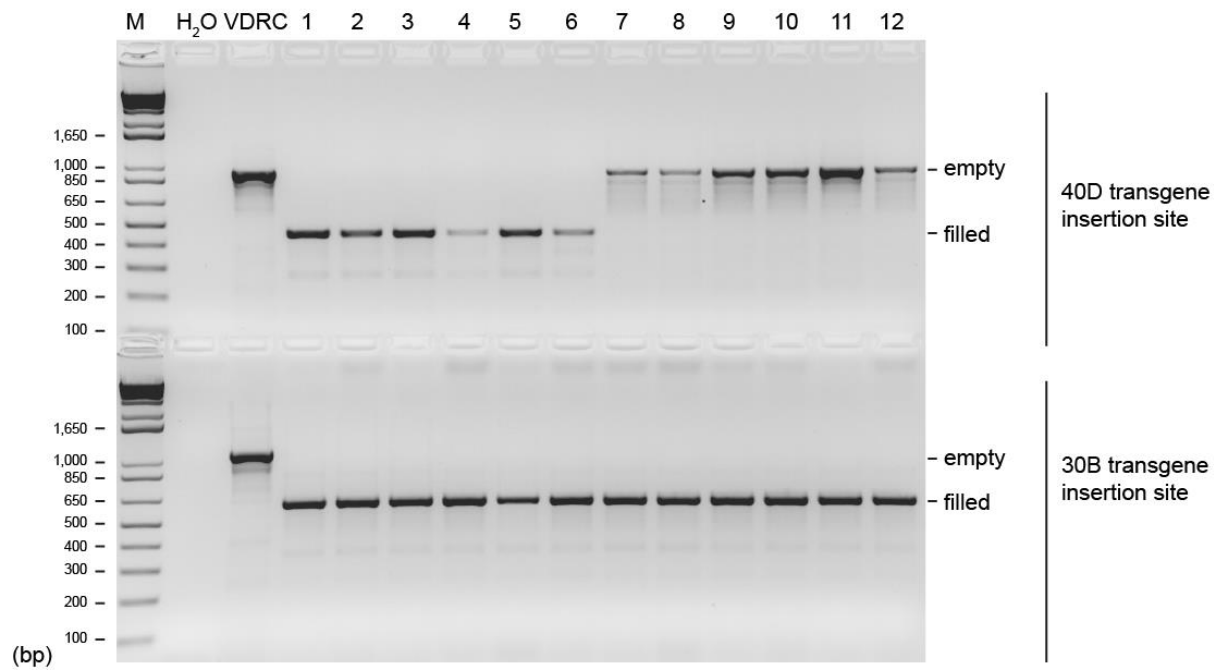

**Supplementary Figure 3. Analysis of site occupancy in KK RNAi lines targeting known Hippo pathway components.**

PCRs were performed as described in Methods<sup>1</sup> and run on 2% agarose gel. Numbering according to Supplementary Table 1. H<sub>2</sub>O: water control. VDRC: VDRC genetic background.

Supplementary Figure 4

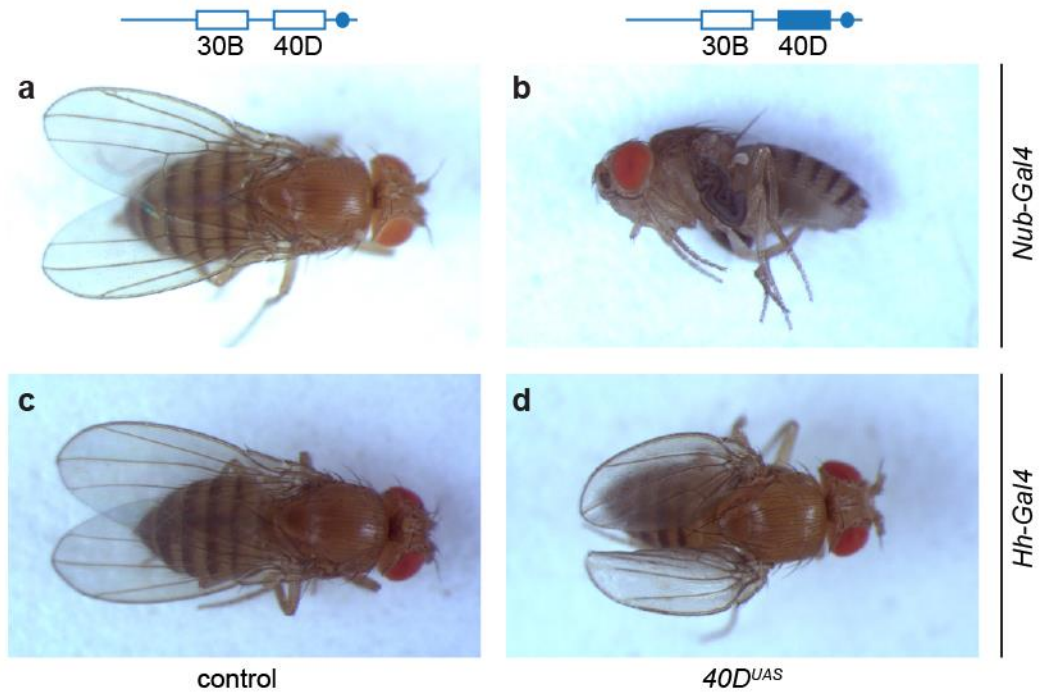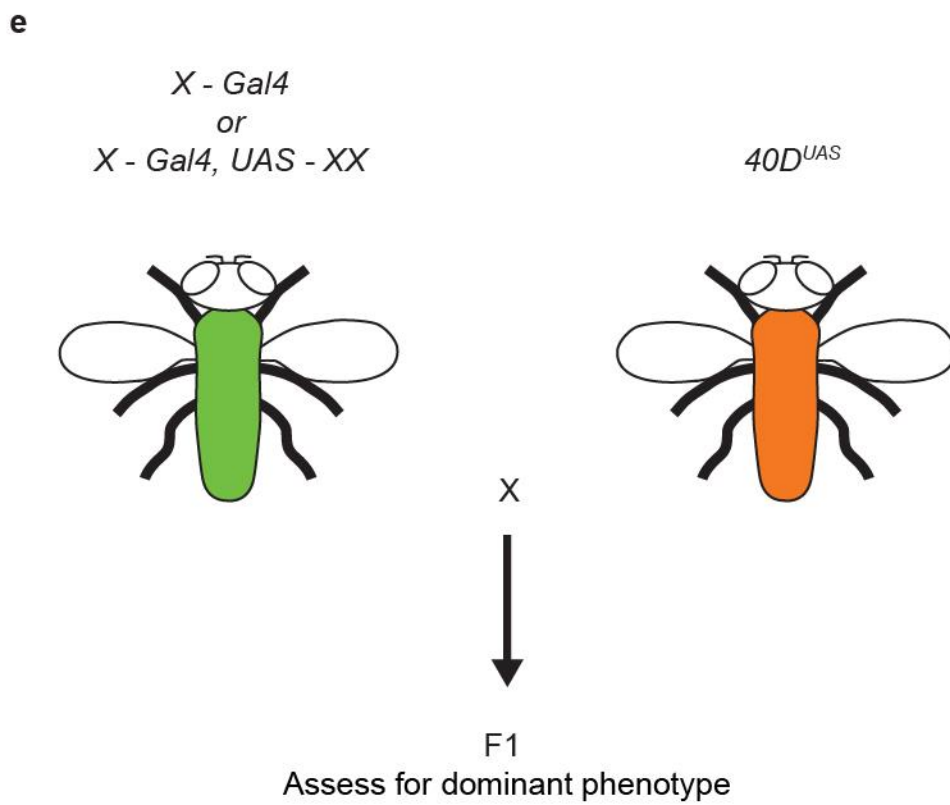

**Supplementary Figure 4. The  $40D^{UAS}$  line can be used to determine whether screening system is affected by transgene integration at 40D in VDRC KK RNAi lines.**

**(a,b)** F1 flies carrying *Nubbin-Gal4* and VDRC genetic background (control) **(a)** or  $40D^{UAS}$  **(b)**.

**(c,d)** F1 flies carrying *Hedgehog-Gal4* and VDRC genetic background (control) **(c)** or  $40D^{UAS}$  **(d)**.

**(e)** A typical screening line will harbour a *Gal4* driver of interest, and optionally a *UAS*-driven transgene. Shown is a schematic representation of a cross to the  $40D^{UAS}$  line described in this manuscript. Based on whether the F1 progeny of this cross shows a dominant phenotype(s), researchers can assess whether VDRC KK RNAi lines are suitable for their experiments and/or genetic screens.

**SUPPLEMENTARY TABLE 1**

|    | Transformant ID | Construct ID | Gene CG number | Gene symbol  | pKC26 integrated at non-annotated pKC43 (30B) | pKC26 integrated at annotated pKC43 (40D) |
|----|-----------------|--------------|----------------|--------------|-----------------------------------------------|-------------------------------------------|
| 1  | 104523          | 109756       | <i>CG4005</i>  | <i>yki</i>   | x                                             | x                                         |
| 2  | 106174          | 101055       | <i>CG12072</i> | <i>wts</i>   | x                                             | x                                         |
| 3  | 101323          | 107562       | <i>CG33193</i> | <i>sav</i>   | x                                             | x                                         |
| 4  | 107645          | 108458       | <i>CG14217</i> | <i>Tao</i>   | x                                             | x                                         |
| 5  | 108254          | 107857       | <i>CG17090</i> | <i>HipK</i>  | x                                             | x                                         |
| 6  | 105093          | 113571       | <i>CG5651</i>  | <i>pix</i>   | x                                             | x                                         |
| 7  | 104169          | 101704       | <i>CG11228</i> | <i>hpo</i>   | x                                             |                                           |
| 8  | 106507          | 111409       | <i>CG33967</i> | <i>kibra</i> | x                                             |                                           |
| 9  | 109281          | 100573       | <i>CG4114</i>  | <i>ex</i>    | x                                             |                                           |
| 10 | 101497          | 108877       | <i>CG8544</i>  | <i>sd</i>    | x                                             |                                           |
| 11 | 108863          | 101190       | <i>CG3352</i>  | <i>fat</i>   | x                                             |                                           |
| 12 | 108260          | 108304       | <i>CG11009</i> | <i>Wbp2</i>  | x                                             |                                           |

**SUPPLEMENTARY TABLE 2**

| <b>Gal4 driver</b> | <b>Control</b>     | <b>40D<sup>UAS</sup></b>        |
|--------------------|--------------------|---------------------------------|
| <i>Actin</i>       | NP                 | pupal lethal                    |
| <i>Tubulin</i>     | NP                 | pupal lethal                    |
| <i>Eyeless</i>     | NP                 | NP                              |
| <i>GMR</i>         | NP                 | NP                              |
| <i>Dorsal</i>      | NP                 | smaller, held out wing          |
| <i>Patched</i>     | NP                 | smaller wings, held up and out  |
| <i>Fringe</i>      | NP                 | small, deformed, held back wing |
| <i>Lozenge</i>     | NP                 | NP                              |
| <i>Serrate</i>     | NP                 | smaller, held out wing          |
| <i>Hedgehog</i>    | NP                 | smaller, held out wing          |
| <i>Engrailed</i>   | NP                 | held back wing                  |
| <i>Scalloped</i>   | NP                 | small, held out wing            |
| <i>Apterous</i>    | mildly curled wing | small, deformed wing            |
| <i>Rotund</i>      | NP                 | smaller, held out wing          |
| <i>MS1096</i>      | NP                 | small, deformed, held back wing |
| <i>Nubbin</i>      | NP                 | small, uninflated wing          |
| <i>32B</i>         | NP                 | small, held back wing           |
| <i>71B</i>         | NP                 | smaller, held up wing           |
| <i>Spalt major</i> | NP                 | smaller, held out wing          |
| <i>C5</i>          | NP                 | NP                              |
| <i>Pannier</i>     | NP                 | NP                              |
| <i>Myosin 1A</i>   | NP                 | NP                              |

|              |    |    |
|--------------|----|----|
| <i>Twist</i> | NP | NP |
| <i>dNab</i>  | NP | NP |
| <i>Elav</i>  | NP | NP |

(NP: no phenotype)



## SUPPLEMENTARY METHODS

### *Drosophila* genetics

Male flies from the Bloomington TRiP and VDRC ‘GD’ RNAi collections, the VDRC genetic background (GD60100), *40D<sup>UAS</sup>*, *w;;UAS-GFP* and *w;; UAS-tio<sup>2</sup>* strains were crossed to *w; GMR-Gal4, UAS-Yki<sup>S168A</sup>-YFP/TM6B<sup>3</sup>*, *w;; GMR-Gal4, UAS-EYFP/TM6B*, *w;; GMR-Gal4, UAS-Myc/TM3*, or *w; GMR-Gal4, UAS-InR/CyO* virgin female flies.

For the experiment described in Supplementary Figure 1f,g, genotypes were *w; GMR-Yki/+* and *w; GMR-Yki/+; MBDlike<sup>1</sup>*. Flies carrying the *MBDlike<sup>1</sup>* allele (*P{EPgy2}MBDlike<sup>EY04582</sup>*)<sup>4</sup> were from Bloomington, USA. Flies carrying the *GMR-Yki* transgene have been described in<sup>5</sup>.

To generate the genotypes in Supplementary Figure 4 and Supplementary Table 2, we crossed *40D<sup>UAS</sup>* or VDRC genetic background (GD60100) virgin females to males carrying the indicated Gal4 drivers.

At least 30 adult eyes of 1-2 day old females were assessed.

## SUPPLEMENTARY REFERENCES

- 1 Green, E. W., Fedele, G., Giorgini, F. & Kyriacou, C. P. A *Drosophila* RNAi collection is subject to dominant phenotypic effects. *Nature methods* **11**, 222-223, doi:10.1038/nmeth.2856 (2014).
- 2 Denholm, B. *et al.* The tiptop/teashirt genes regulate cell differentiation and renal physiology in *Drosophila*. *Development* **140**, 1100-1110, doi:10.1242/dev.088989 (2013).
- 3 Poon, C. L., Lin, J. I., Zhang, X. & Harvey, K. F. The sterile 20-like kinase Tao-1 controls tissue growth by regulating the Salvador-Warts-Hippo pathway. *Developmental cell* **21**, 896-906, doi:10.1016/j.devcel.2011.09.012 (2011).
- 4 Marhold, J., Kramer, K., Kremmer, E. & Lyko, F. The *Drosophila* MBD2/3 protein mediates interactions between the MI-2 chromatin complex and CpT/A-methylated DNA. *Development* **131**, 6033-6039, doi:10.1242/dev.01531 (2004).
- 5 Huang, J., Wu, S., Barrera, J., Matthews, K. & Pan, D. The Hippo signaling pathway coordinately regulates cell proliferation and apoptosis by inactivating Yorkie, the *Drosophila* Homolog of YAP. *Cell* **122**, 421-434, doi:10.1016/j.cell.2005.06.007 (2005).
